# Supplementary material for: Knocking Down Gm16685 Decreases Liver Granuloma in Murine Schistosomiasis Japonica
Source: MDPI journal article supplement (doi:10.3390/microorganisms11030796), 2023-03-21
Supplement: s1 [file s1]

**Table S1.** Primer sequences of genes.

|               | Primer         | Sequence (5'-3')         |
|---------------|----------------|--------------------------|
| Actin         | Forward primer | AGAGGGAAATCGTGC GTGAC    |
|               | Reverse primer | CAATAGTGATGACCTGGCCGT    |
| MEG3          | Forward primer | GGACTTCACGCACAACACGTT    |
|               | Reverse primer | GTCCACACGCAGGATTCCA      |
| NR-028126     | Forward primer | TGGGACCACTGAGCCAATTT     |
|               | Reverse primer | TACTGGCTTTCCAGGGGACT     |
| Mirt          | Forward primer | GAGTCCCCTCGTATCAGTGC     |
|               | Reverse primer | GCCGAGAATGACCCTGTACC     |
| NR-110365     | Forward primer | AGGCTGGGAGAGGGTATCAC     |
|               | Reverse primer | TGCAGCAGAAGAGTAGGGGT     |
| 5830428M24RIK | Forward primer | AGGATGTCAAGGGCAAAGGT     |
|               | Reverse primer | TTCGGAGCCTTGTTTCCACA     |
| Cdkn1B        | Forward primer | TACTAGGAAGGTACAGGCGGG    |
|               | Reverse primer | AGGACACAGGGCAAACCTTCT    |
| AI662270      | Forward primer | AACTACCTCTGCCGCCATTT     |
|               | Reverse primer | GGGGTTCTGCCTCTTGATGT     |
| 1700025B11Rik | Forward primer | GAGAGTGTCGTCATCCCACA     |
|               | Reverse primer | CCAGCGATGGAGCTCAAGAC     |
| 0610039H22Rik | Forward primer | AACCGCAACTGCATCCTTCA     |
|               | Reverse primer | TCCAAGGAGCACAATCCACA     |
| F630028O10Rik | Forward primer | TCCCATCCAAGACAAAGGCAC    |
|               | Reverse primer | TCCAGTTCACACCTTTCAGACC   |
| Gm16685       | Forward primer | GGACCTTGTC AAGCACATTCCAG |
|               | Reverse primer | GAAAGCCCTCTTTAAAGCACC    |
| H19           | Forward primer | GAAGGCGAGGATGACAGGTG     |
|               | Reverse primer | CGGATTCAAAGGCCCAGACA     |
| IL-12A        | Forward primer | CTGTGCCTTGGTAGCATCTATG   |
|               | Reverse primer | GCAGAGTCTCGCCATTATGATTC  |
| CCL1          | Forward primer | TGCCGTGTGGATACAGGATG     |
|               | Reverse primer | GTTGAGGCGCAGCTTTCTCTA    |
| IL-4          | Forward primer | CTCATGGAGCTGCAGAGACTCTT  |
|               | Reverse primer | CATTCATGGTGCAGCTTATCGA   |
| IL-10         | Forward primer | TGAAGACCCTCAGGATGCGG     |
|               | Reverse primer | AGAGCTCTGTCTAGGTCCTGG    |
| IL-13         | Forward primer | CCTGGCTCTTGCTTGCCTT      |
|               | Reverse primer | GGTCTTGTGTGATGTTGCTCA    |
| TGFβ          | Forward primer | ACAATTCTTGCGTTACCTT      |
|               | Reverse primer | AGCCCTGTATTCCGTCTCC      |
| FIZZ1         | Forward primer | CCCTCCACTGTAACGAAGACTC   |
|               | Reverse primer | CACACCCAGTAGCAGTCATCC    |
| IL-1β         | Forward primer | CTGAACTCAACTGTGAAATGC    |
|               | Reverse primer | TGATGTGCTGCTGCGAGA       |
| IL-6          | Forward primer | ACACATGTTCTCTGGGAAATCGT  |
|               | Reverse primer | AAGTGCATCATCGTTGTTCATACA |
| CD86          | Forward primer | TGTTTCCGTGGAGACGCAAG     |
|               | Reverse primer | TTGAGCCTTTGTAAATGGGCA    |
| CD80          | Forward primer | ACCCCAACATAACTGAGTCT     |
|               | Reverse primer | TTCCAACCAAGAGAAGCGAGG    |
| U6            | Forward primer | AACGCTTCACGAATTTGCGT     |

|            |                |                      |
|------------|----------------|----------------------|
| miR-205-5p | Reverse primer | CTCGCTTCGGCAGCACA    |
|            | Forward primer | CCTCCTTCATTCCACCGG   |
|            | Reverse primer | CCAGTGCAGGGTCCGAGGTA |

---
